# Supplementary material for: Structural and Photophysical Properties of Methylammonium Lead Tribromide (MAPbBr3) Single Crystals
Source: PubMed Central journal article supplement (PMC5651898; doi:10.1038/s41598-017-13571-1), 2017-10-20
Supplement: 41598_2017_13571_MOESM1_ESM.pdf [file 41598_2017_13571_MOESM1_ESM.pdf]

# Supporting Information

## Structural and Photophysical Properties of Methylammonium Lead Tribromide (MAPbBr<sub>3</sub>) Single Crystals

*Kai-Hung Wang<sup>1</sup>, Liang-Chen Li<sup>3</sup>, Muthaiah Shellaiah<sup>1</sup>, and Kien Wen Sun<sup>1,2,3,\*</sup>*

<sup>1</sup>Department of Applied Chemistry, National Chiao Tung University, 1001 University Road,  
Hsinchu 30010, Taiwan

<sup>2</sup>Department of Electronics Engineering, National Chiao Tung University, 1001 University  
Road, Hsinchu 30010, Taiwan

<sup>3</sup>Center for Nano Science and Technology, National Chiao Tung University, Hsinchu 30010,  
Taiwan.

**Table of contents:**

SEM and TEM images of MAPbBr<sub>3</sub> single crystals **(S3)**

XRD patterns of MAPbBr<sub>3</sub> single crystals measured at 300 - 20 K **(S4)**

Contour mapping of the the PL spectra **(S5)**

Illustraion of the structural changes at different temperature stages **(S6)**

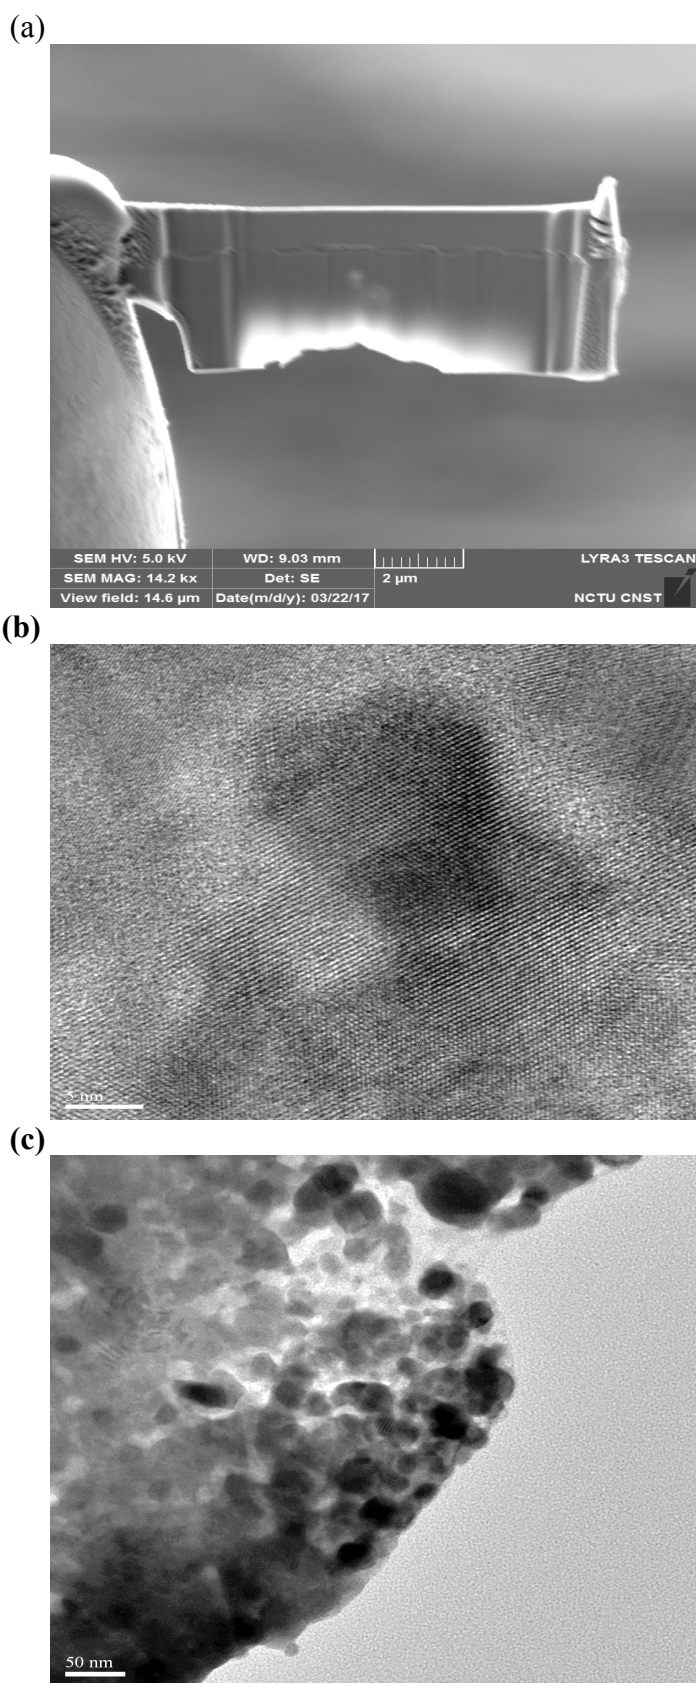

**Figure S1.** (a) SEM image of a thin slice cut from MAPbBr<sub>3</sub> single crystals using focus ion beam (b) TEM image of of MAPbBr<sub>3</sub> single crystal (c) TEM image of MAPbBr<sub>3</sub> single crystal powder. Amorphization or liquidation of the samples immediately occurred during the observation.

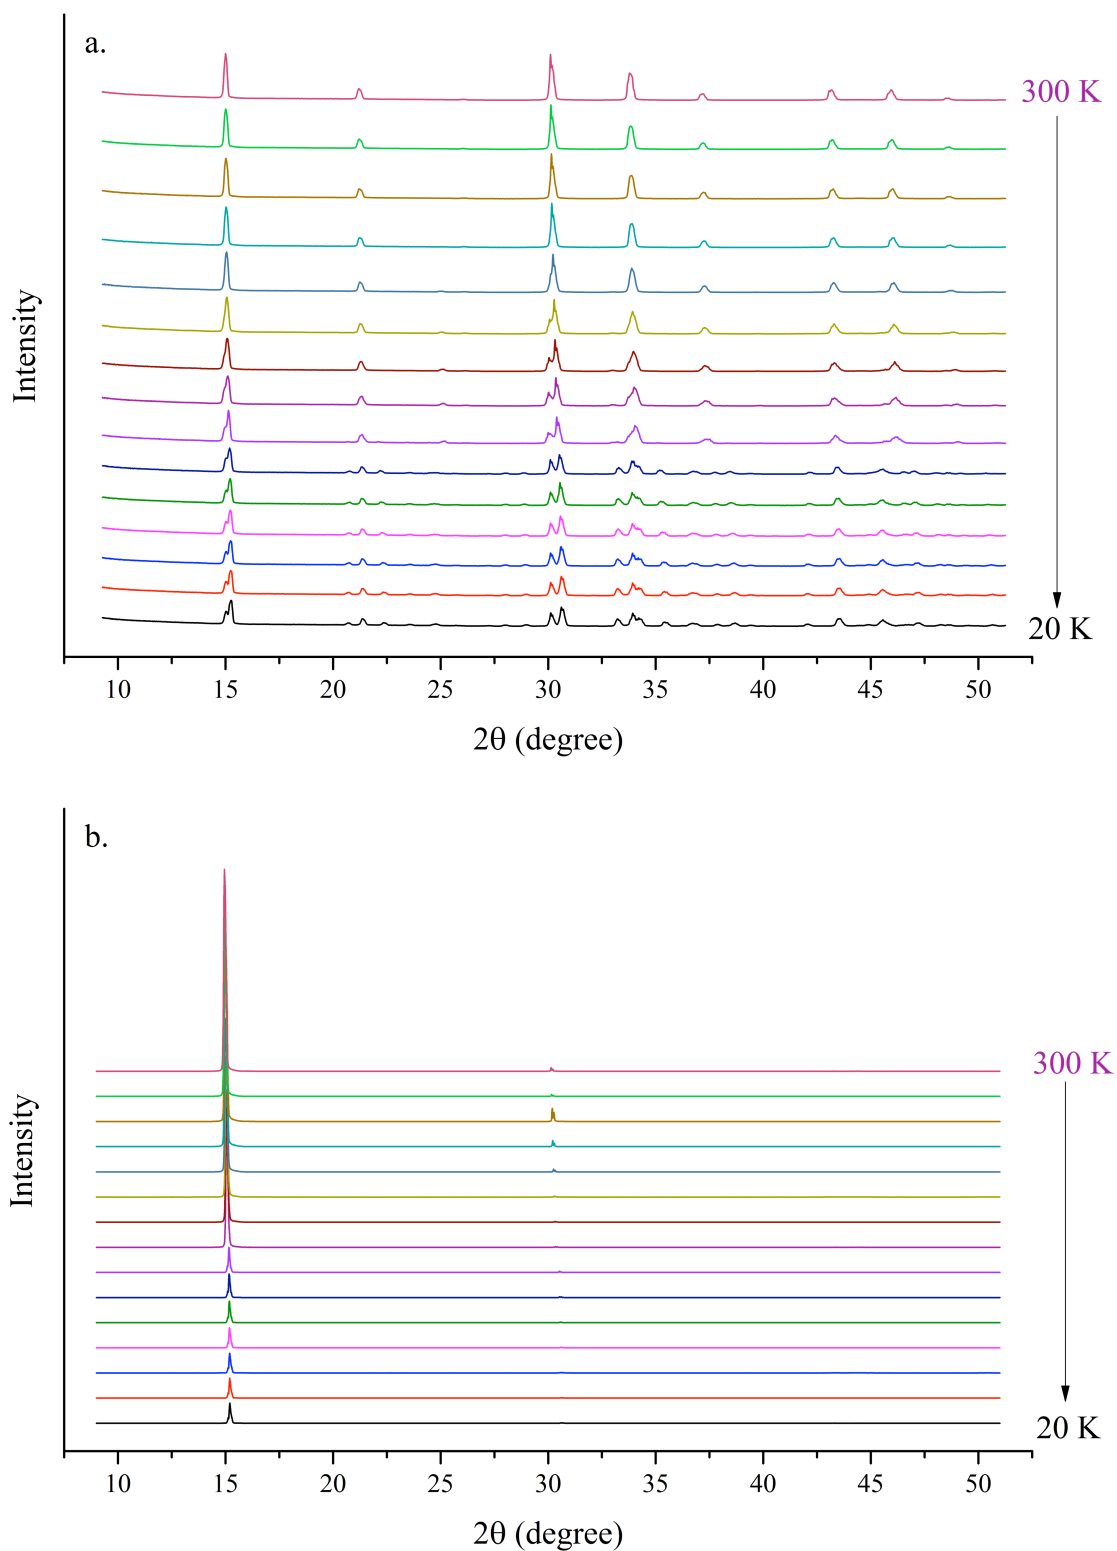

**Figure S2.** (a) The powder and (b) single-crystal XRD patterns of MAPbBr<sub>3</sub> single crystals measured at 300 - 20 K. The doublet structure in the (200) peak is due to the slight difference in the diffraction angle between the K $\alpha$ 1 and K $\alpha$ 2 lines.

## Temperature Dependent

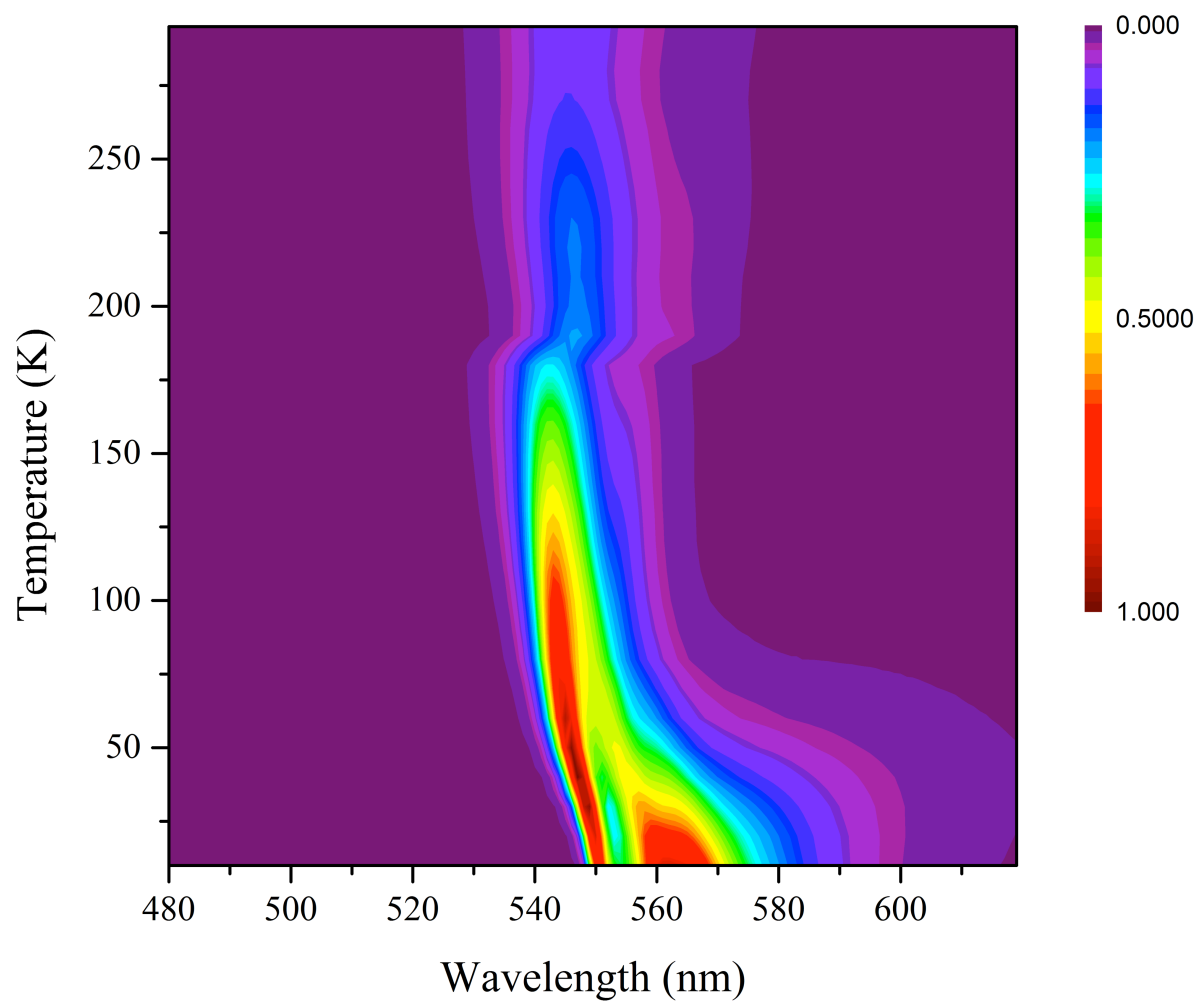

**Figure S3.** Contour mapping of the the PL spectra of MAPbBr<sub>3</sub> single crystals measured at 300 - 20 K.

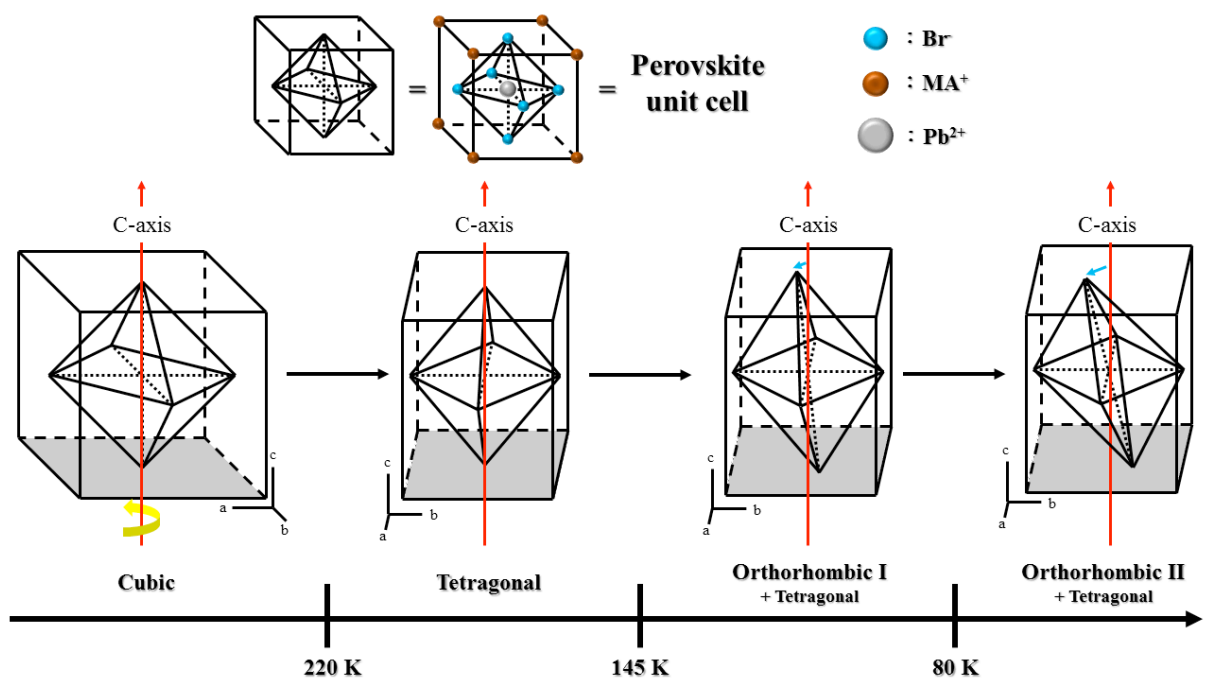

**Figure S4.** The structural changes at different temperature stages throughout the cooling process are displayed through a schematic of the 3D MAPbBr<sub>3</sub> crystal structure.
